# Supplementary material
Source: Springer Nature journal article supplement (https://www.springermedizin.de/resource/supplementary/12958_2013_1093_MOESM3_ESM.pdf/9566786)

a) Group N

**MMP test 1**

negative

**Embryo Transfer**

cycle 1

cycle 2

cycle 3

b) Group P

**MMP test 1**

positive

**MMP test 2**

**Embryo Transfer**

cycle 1

cycle 2

cycle 3

antibiotics  
+  
corticosteroids

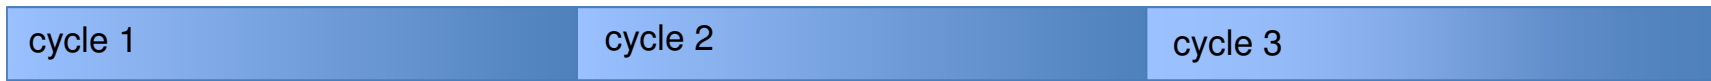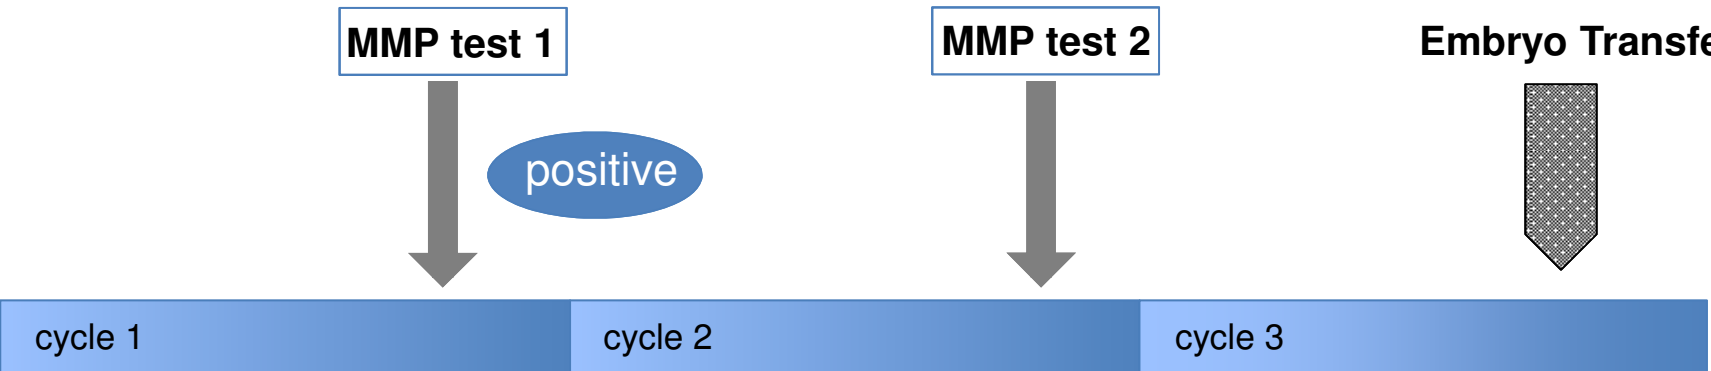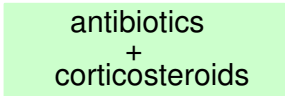

Supplement: MOESM3 [file 9566786]
